# Supplementary material for: Investigating the Relation between Skin Cell Wall Composition and Phenolic Extractability in Cabernet Sauvignon Wines
Source: MDPI journal article supplement (doi:10.3390/fermentation8080401), 2022-08-18
Supplement: s1 [file s1]

**Table S1-** Grape juice basic chemical composition.

| Site              | Brix<br>(°) | pH   | Titrateable Acidity<br>(g/100 mL) | NOPA<br>(mg/L) | Ammonia<br>(mg/L) | YAN<br>(mg/L) | FSO2<br>(mg/L) | TSO2<br>(mg/L) |
|-------------------|-------------|------|-----------------------------------|----------------|-------------------|---------------|----------------|----------------|
| <b>S1 - Rep 1</b> | 23.70       | 3.94 | 0.40                              | 31             | 15                | 43            | 34             | 73             |
| <b>S1 - Rep 2</b> | 23.60       | 3.92 | 0.38                              | 31             | 18                | 46            | 46             | 83             |
| <b>S2 - Rep 1</b> | 26.80       | 3.71 | 0.39                              | 49             | 48                | 88            | 40             | 89             |
| <b>S2 - Rep 2</b> | 26.90       | 3.70 | 0.40                              | 39             | 40                | 72            | 46             | 111            |
| <b>S3 - Rep 1</b> | 25.20       | 3.75 | 0.44                              | 45             | 50                | 86            | 42             | 92             |
| <b>S3 - Rep 2</b> | 25.50       | 3.75 | 0.45                              | 48             | 46                | 86            | 45             | 109            |
| <b>C1 - Rep 1</b> | 26.50       | 3.88 | 0.35                              | 75             | 73                | 135           | 55             | 129            |
| <b>C1 - Rep 2</b> | 26.70       | 3.83 | 0.35                              | 68             | 75                | 130           | 51             | 114            |
| <b>C2 - Rep 1</b> | 26.00       | 3.90 | 0.30                              | 51             | 42                | 86            | 41             | 104            |
| <b>C2 - Rep 2</b> | 25.10       | 4.00 | 0.35                              | 67             | 68                | 123           | 37             | 87             |
| <b>C3 - Rep 1</b> | 23.00       | 3.66 | 0.42                              | 44             | 63                | 96            | 29             | 72             |
| <b>C3 - Rep 2</b> | 22.80       | 3.60 | 0.45                              | 42             | 60                | 91            | 39             | 95             |

**Table S2-** Wine basic chemical composition.

| <b>Site</b>       | <b>Alcohol<br/>(% ABV)</b> | <b>Titrateable Acidity<br/>(g/100 mL)</b> | <b>pH</b> | <b>Malic Acid<br/>(mg/L)</b> | <b>Volatile Acidity<br/>(g/100 mL)</b> | <b>Free SO<sub>2</sub><br/>(mg/L)</b> | <b>Total SO<sub>2</sub><br/>(mg/L)</b> |
|-------------------|----------------------------|-------------------------------------------|-----------|------------------------------|----------------------------------------|---------------------------------------|----------------------------------------|
| <b>S1 - Rep 1</b> | 13.68                      | 0.58                                      | 3.94      | 1369                         | 0.019                                  | 37                                    | 71                                     |
| <b>S1 - Rep 2</b> | 13.56                      | 0.58                                      | 3.92      | 1458                         | 0.022                                  | 36                                    | 73                                     |
| <b>S2 - Rep 1</b> | 14.80                      | 0.58                                      | 3.71      | 1031                         | 0.023                                  | 34                                    | 63                                     |
| <b>S2 - Rep 2</b> | 14.90                      | 0.59                                      | 3.70      | 1061                         | 0.023                                  | 36                                    | 67                                     |
| <b>S3 - Rep 1</b> | 14.33                      | 0.60                                      | 3.75      | 1179                         | 0.024                                  | 32                                    | 67                                     |
| <b>S3 - Rep 2</b> | 14.49                      | 0.61                                      | 3.75      | 1262                         | 0.027                                  | 36                                    | 62                                     |
| <b>C1 - Rep 1</b> | 14.60                      | 0.57                                      | 3.88      | 1129                         | 0.022                                  | 31                                    | 72                                     |
| <b>C1 - Rep 2</b> | 14.57                      | 0.56                                      | 3.83      | 1102                         | 0.022                                  | 33                                    | 72                                     |
| <b>C2 - Rep 1</b> | 14.56                      | 0.58                                      | 3.90      | 1054                         | 0.023                                  | 35                                    | 76                                     |
| <b>C2 - Rep 2</b> | 14.17                      | 0.57                                      | 4.00      | 960                          | 0.026                                  | 30                                    | 68                                     |
| <b>C3 - Rep 1</b> | 12.92                      | 0.65                                      | 3.66      | 1030                         | 0.044                                  | 35                                    | 81                                     |
| <b>C3 - Rep 2</b> | 12.83                      | 0.65                                      | 3.60      | 1095                         | 0.022                                  | 36                                    | 67                                     |

**Table S3** – Grape must weight into each fermentor and volume of wine obtained after pressing

| <b>Site</b>       | <b>Weight into fermentor (kg)</b> | <b>Volume Post-Press (L)</b> |
|-------------------|-----------------------------------|------------------------------|
| <b>S1 - Rep 1</b> | 137.0                             | 44.0                         |
| <b>S1 - Rep 2</b> | 139.0                             | 44.0                         |
| <b>S2 - Rep 1</b> | 148.0                             | 50.0                         |
| <b>S2 - Rep 2</b> | 149.8                             | 49.0                         |
| <b>S3 - Rep 1</b> | 125.2                             | 40.0                         |
| <b>S3 - Rep 2</b> | 126.4                             | 42.0                         |
| <b>C1 - Rep 1</b> | 125.4                             | 41.5                         |
| <b>C1 - Rep 2</b> | 122.8                             | 41.0                         |
| <b>C2 - Rep 1</b> | 140.2                             | 39.0                         |
| <b>C2 - Rep 2</b> | 138.8                             | 44.0                         |
| <b>C3 - Rep 1</b> | 119.4                             | 35.0                         |
| <b>C3 - Rep 2</b> | 120.4                             | 37.0                         |
